# Supplementary figures and images for: Caspase-8 activity has an essential role in CD95/Fas-mediated MAPK activation
Source: PubMed Central journal article supplement — Cell Death Dis. 2011 Oct 6;2(10):e212–. doi: 10.1038/cddis.2011.93 (PMC3219090; doi:10.1038/cddis.2011.93), 2011-10-06

# Figure S4

## A

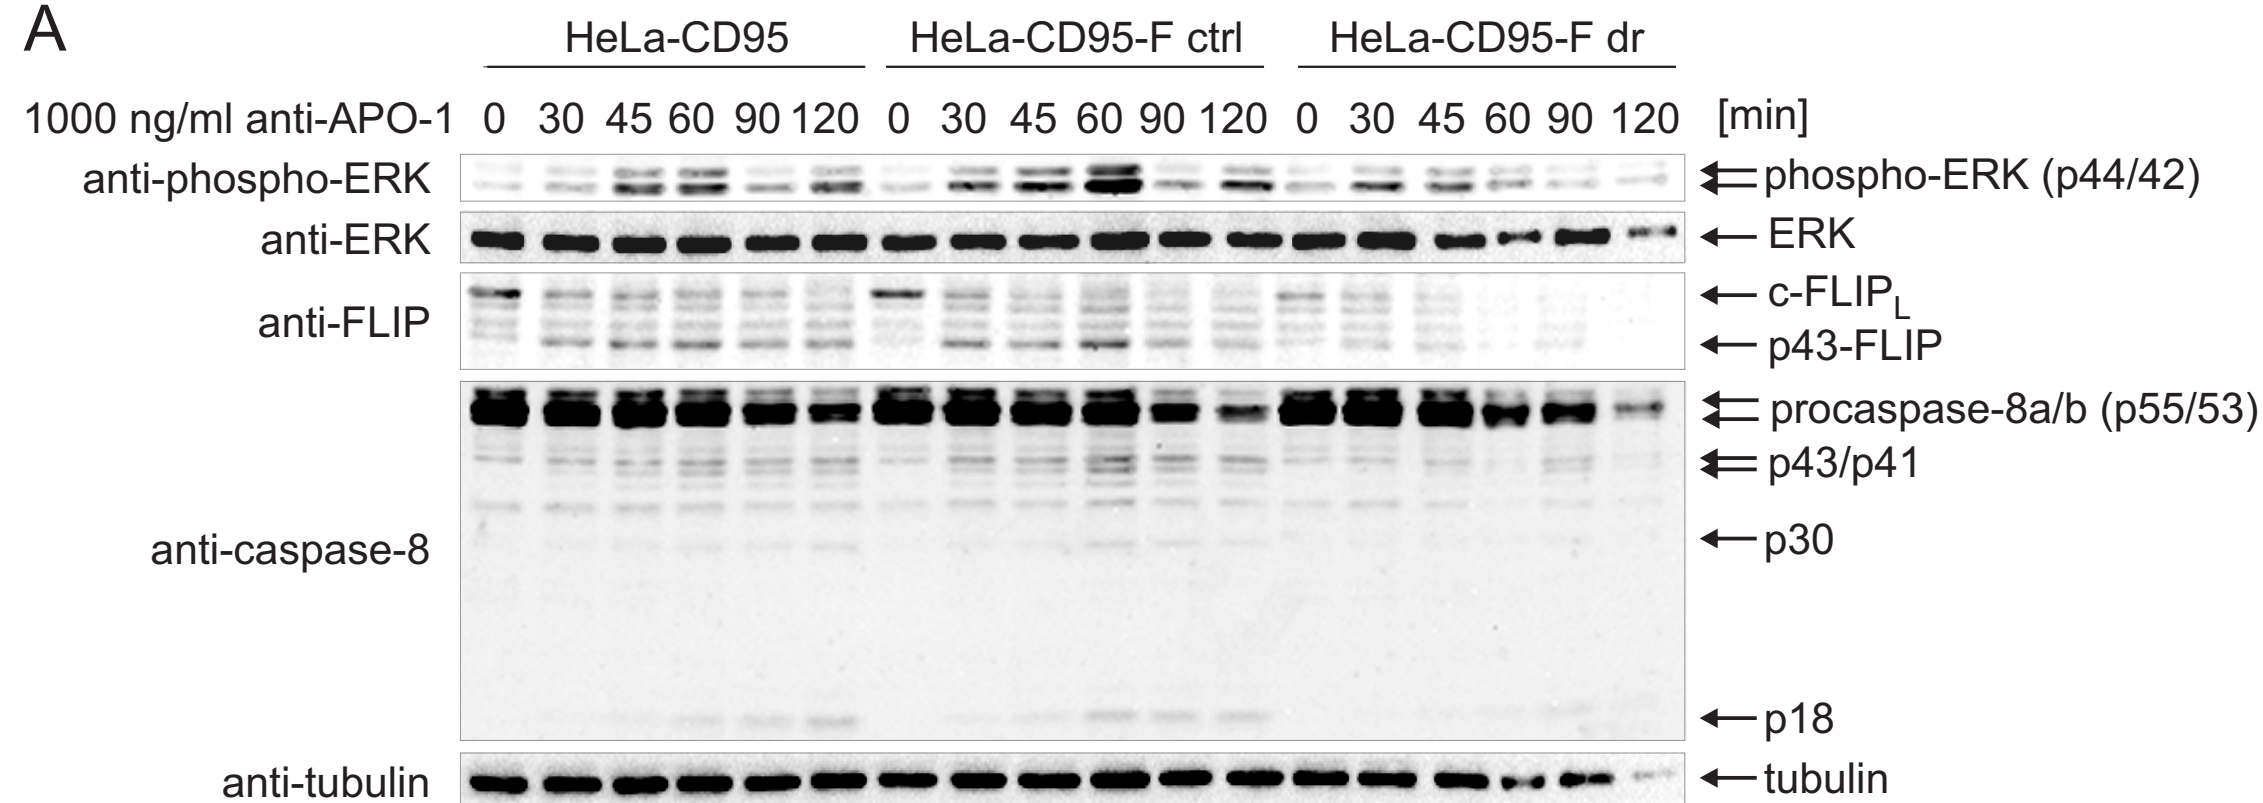

## B

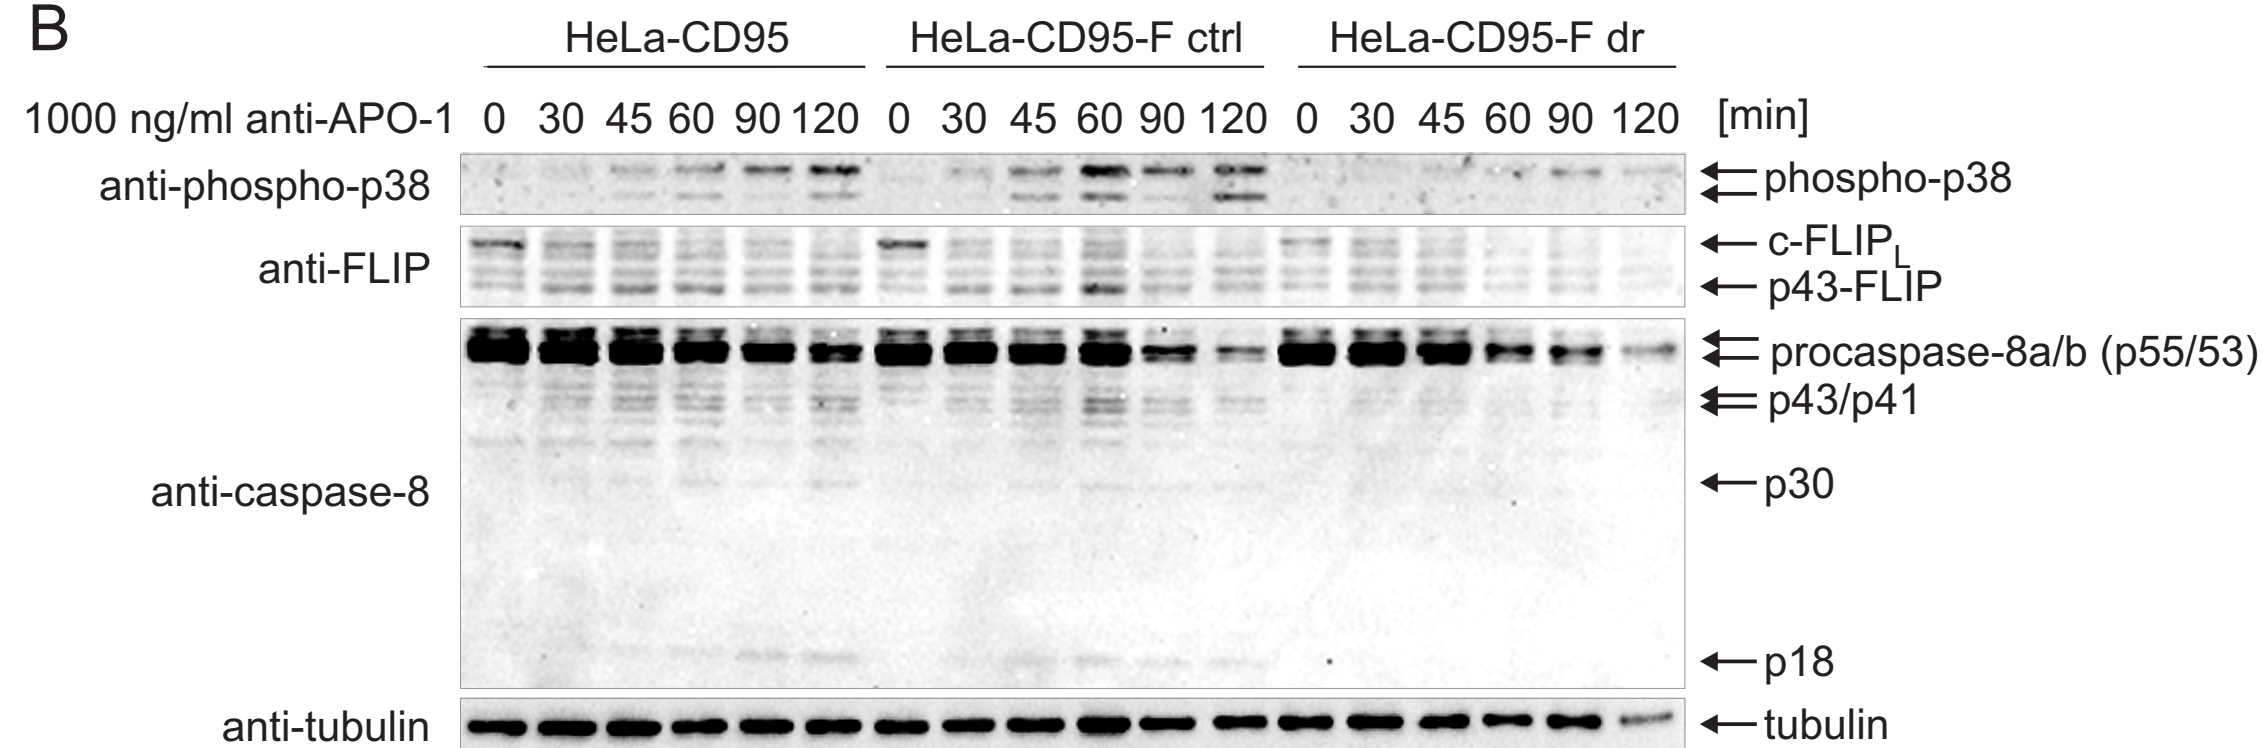

Supplement: cddis201193x5.pdf [file cddis201193x5.pdf]

Figure S6

A

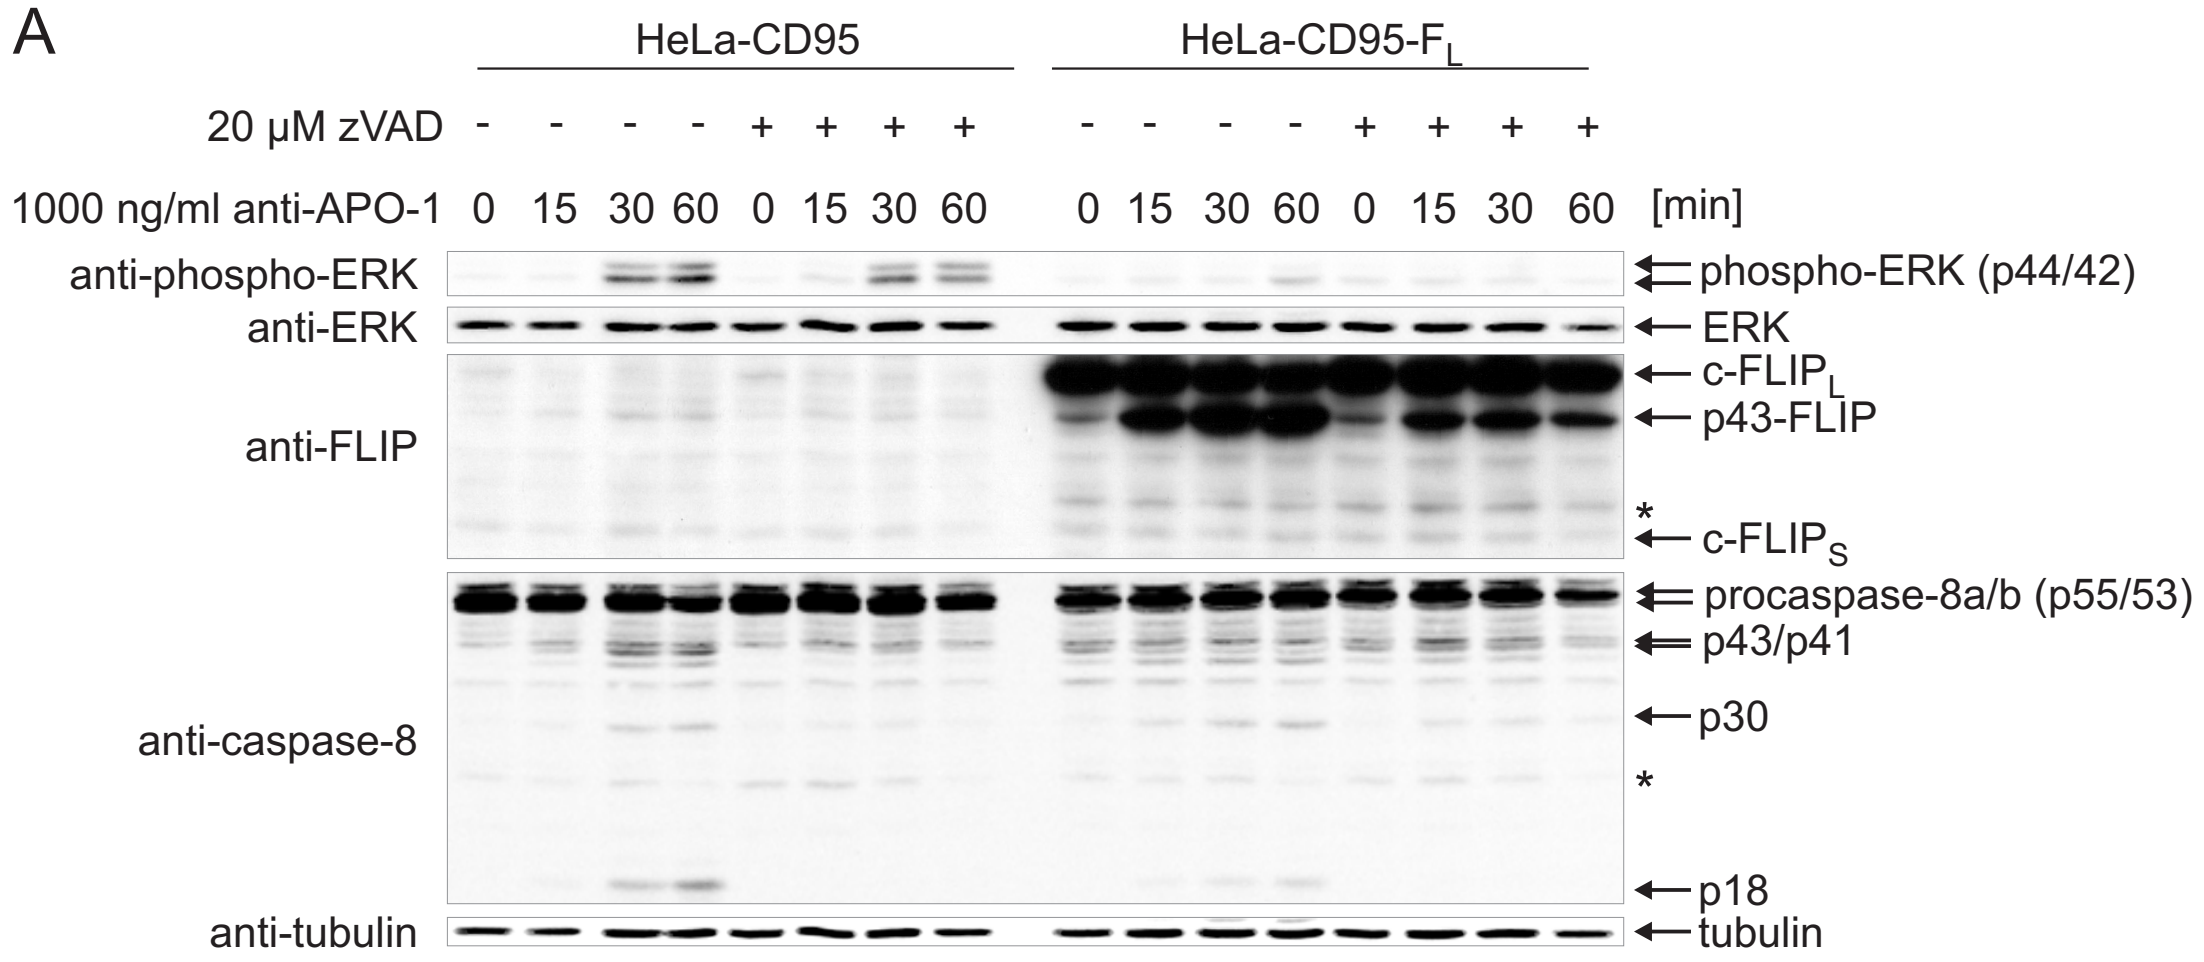

B

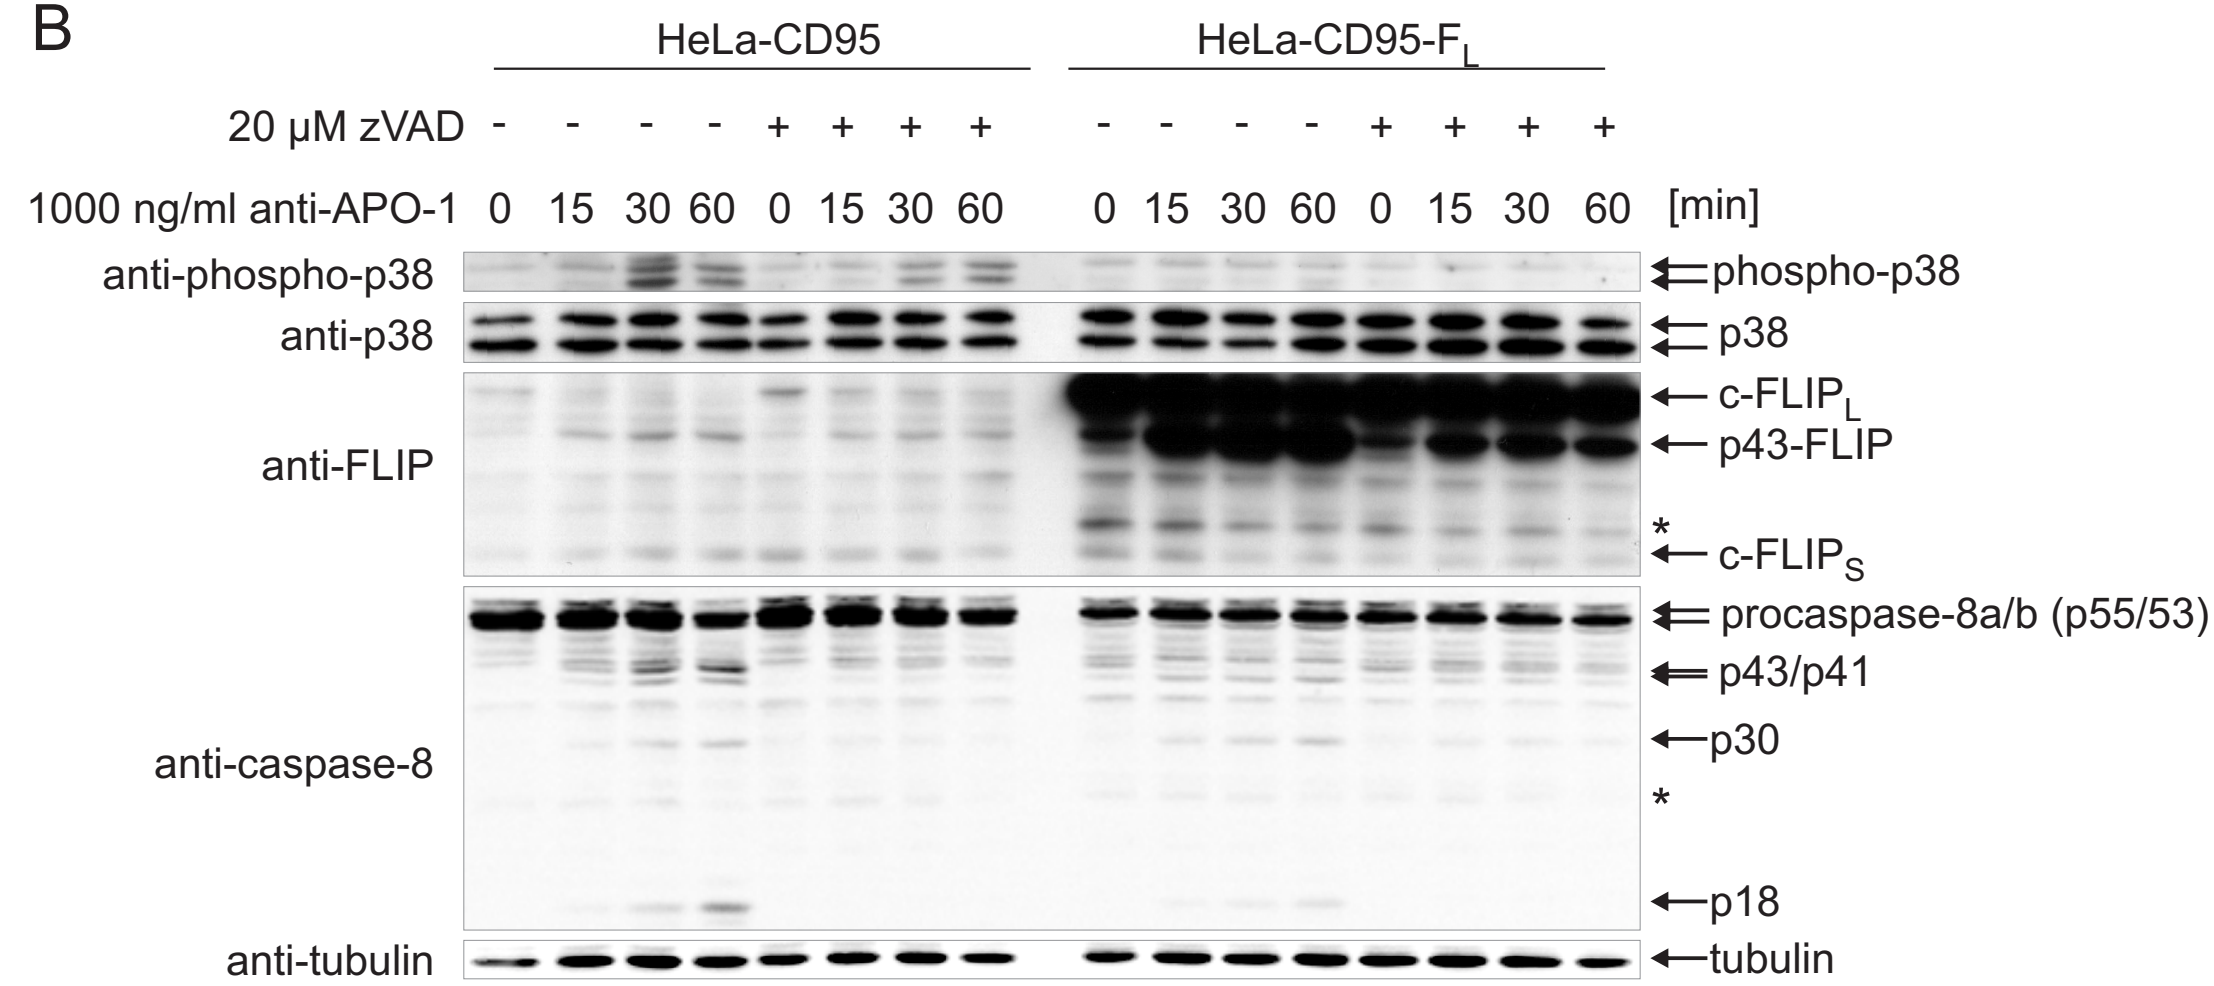

C

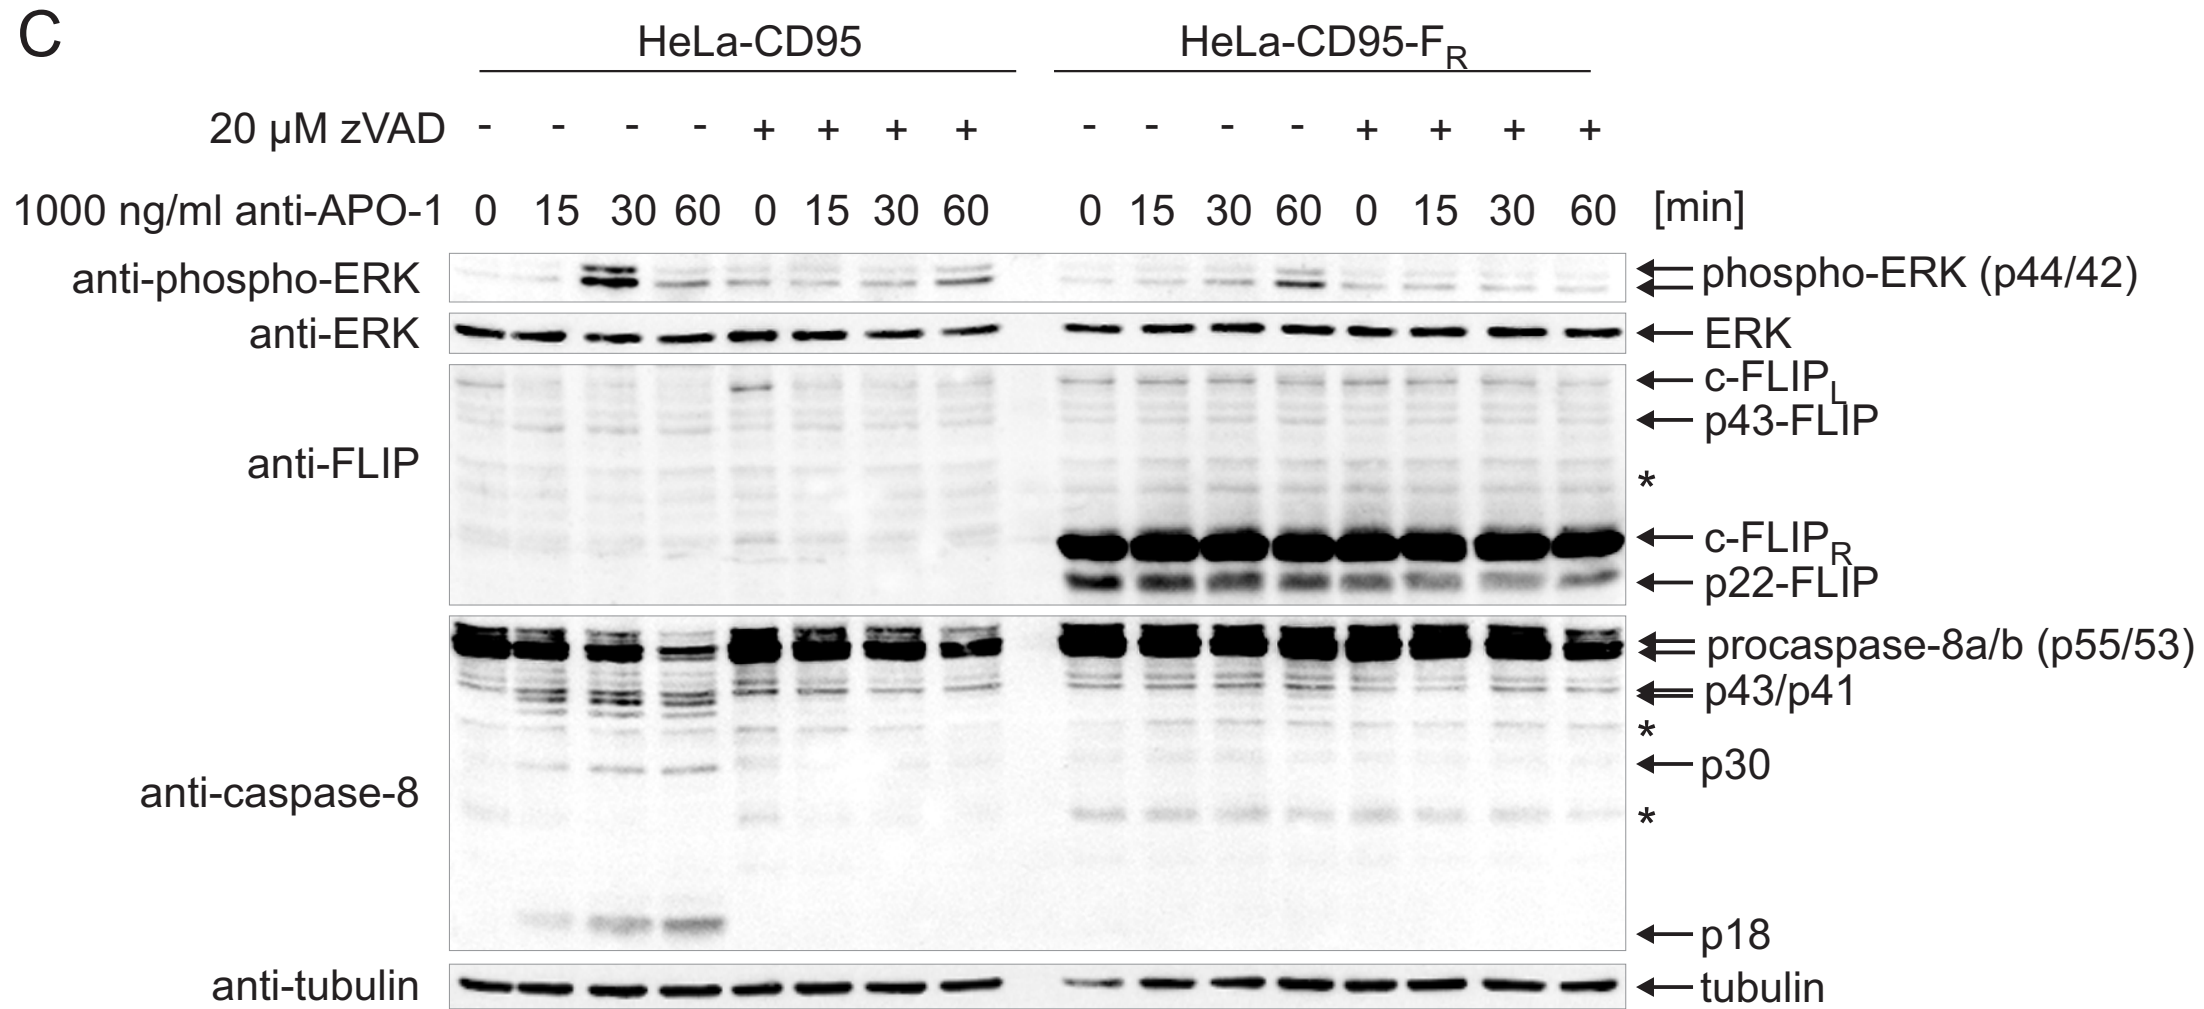

D

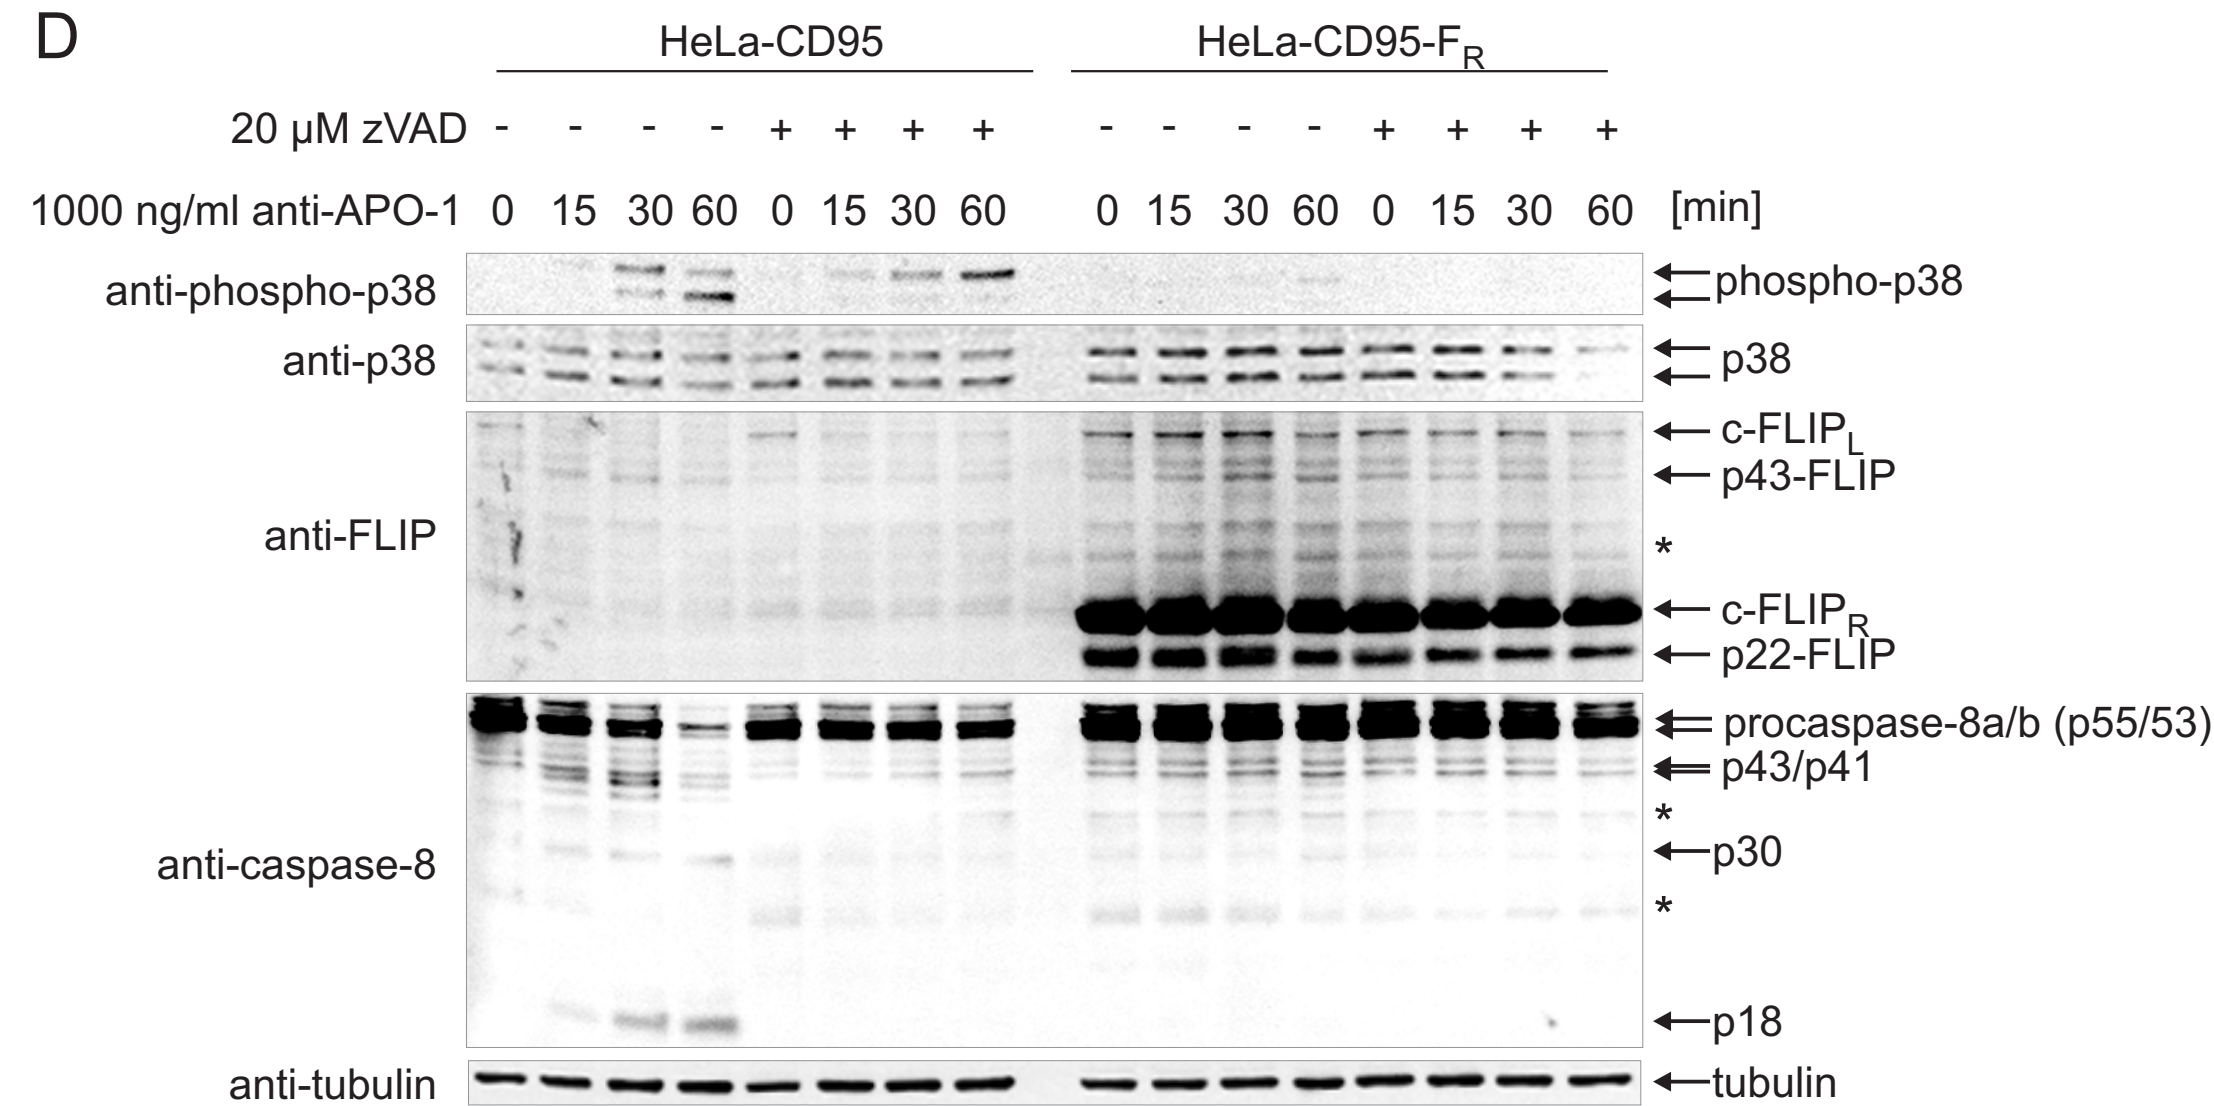

Supplement: cddis201193x7.pdf [file cddis201193x7.pdf]

Figure S7

A

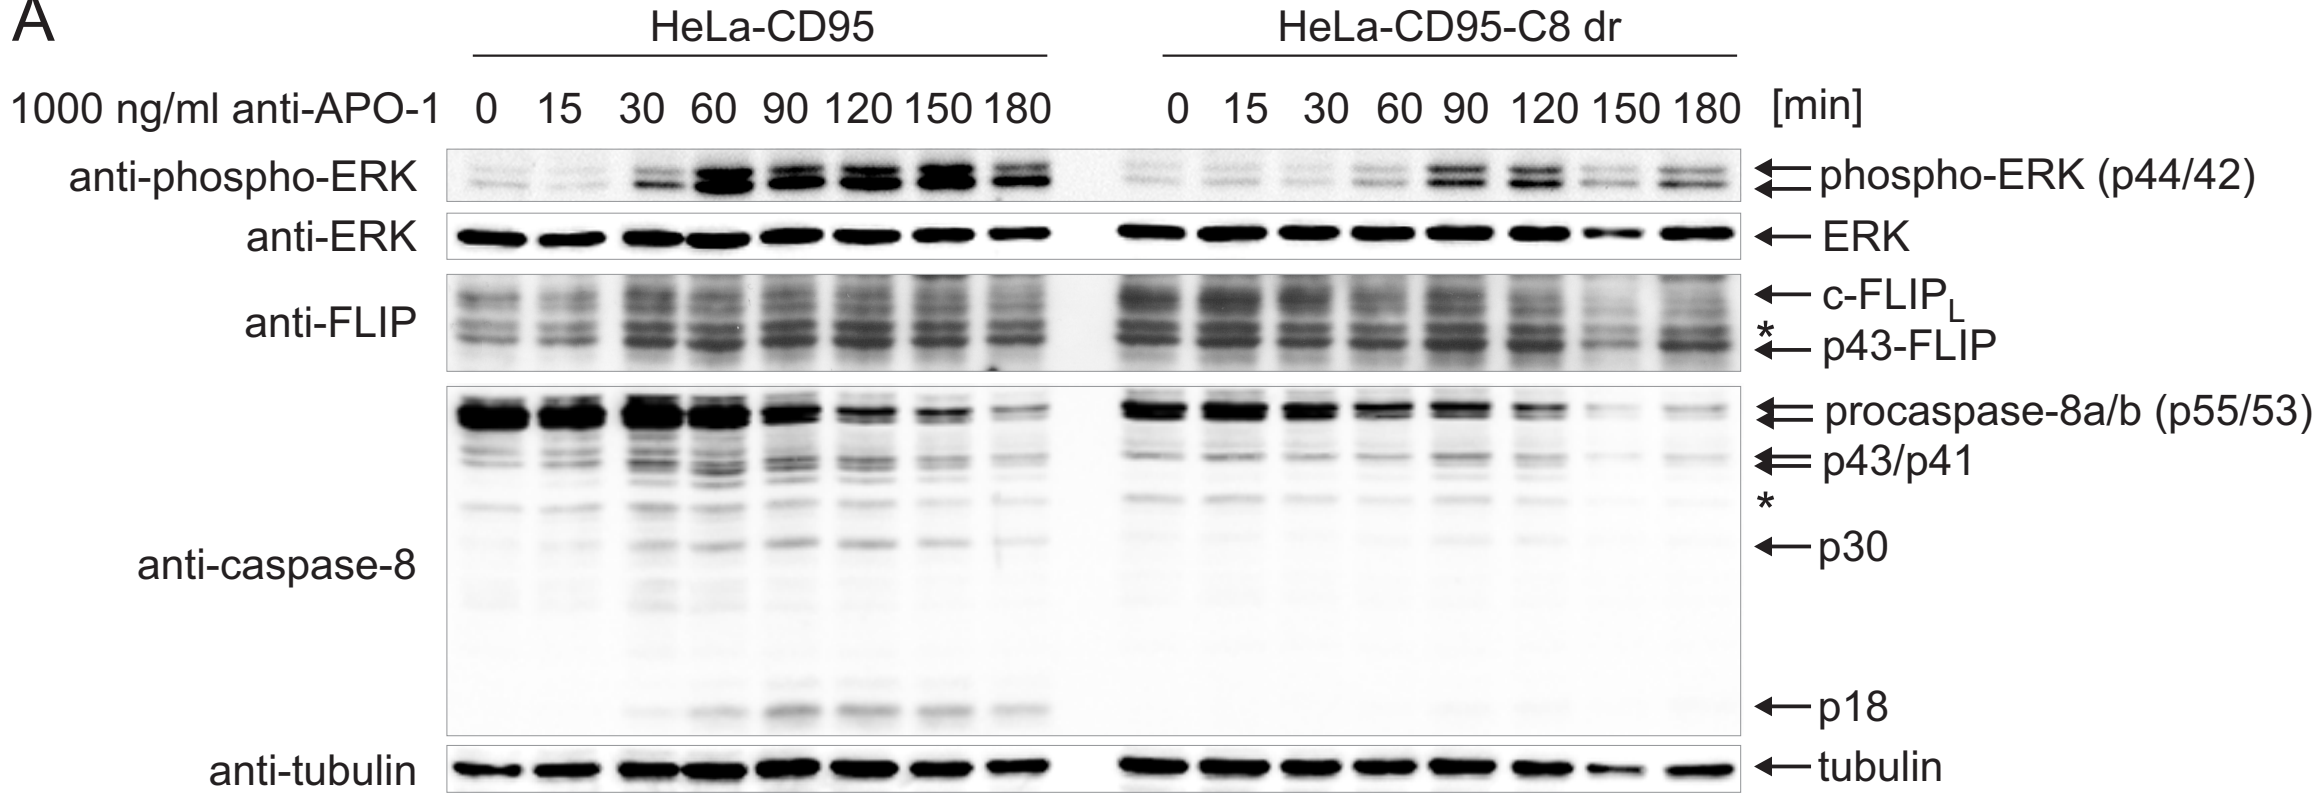

B

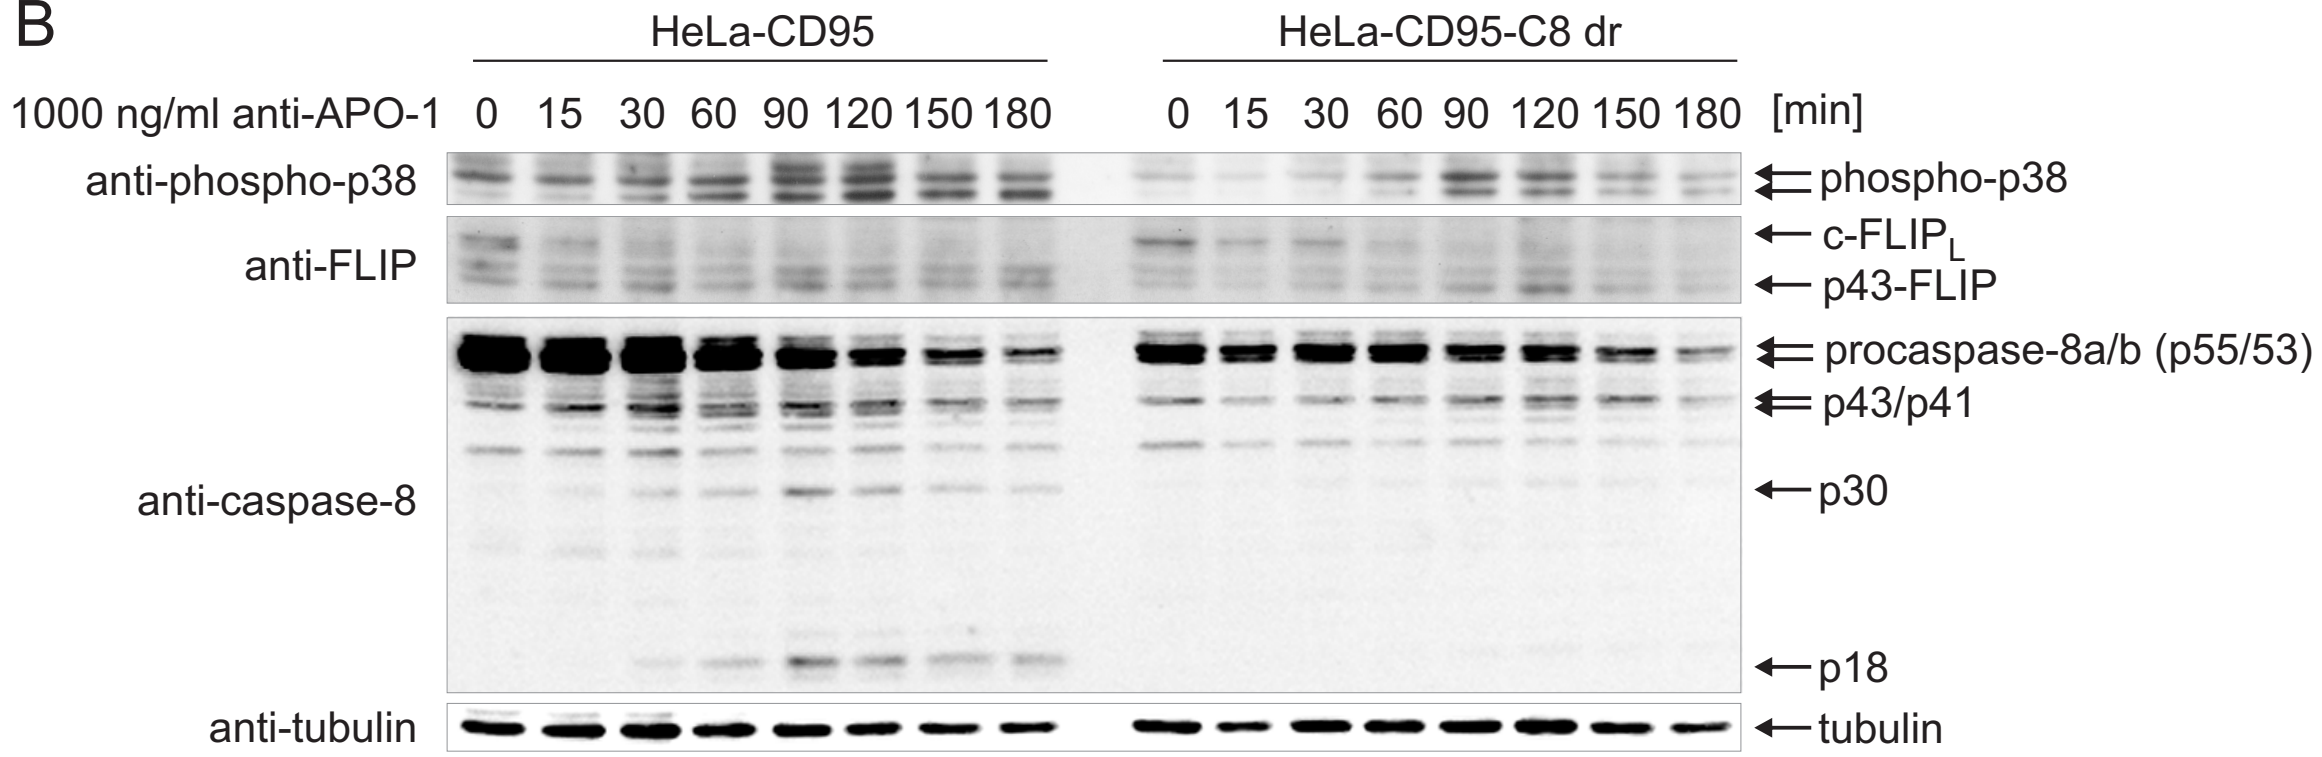

Supplement: cddis201193x8.pdf [file cddis201193x8.pdf]
